# Supplementary material for: A Simple ICT-Based Fluorescent Probe for HOCl and Bioimaging Applications
Source: MDPI journal article supplement (doi:10.3390/bios13070744), 2023-07-18
Supplement: s1 [file s1]

*Supporting information for*

## **A simple ICT-based fluorescent probe for HOCl and bioimaging applications**

Yan Zheng <sup>a</sup>, Shuang Wu<sup>a</sup>, Yifan Bing<sup>a</sup>, Huimin Li<sup>a</sup>, Xueqin Liu<sup>a</sup>, Wenlan Li<sup>a,b</sup>, Xiang Zou<sup>b\*</sup>, Zhongyuan Qu<sup>a\*</sup>

<sup>a</sup>School of Pharmacy, Harbin University of Commerce, Harbin 150076, China.

<sup>b</sup>Engineering Research Center on Natural Antineoplastic Drugs, Ministry of Education, Harbin University of Commerce 150076, China.

*\* Corresponding author.*

E-mail address: zouxiang@hrbcu.edu.cn; qiuqiuqu@163.com

### **Table of contents**

#### **Page**

|                            |           |
|----------------------------|-----------|
| <b>Table S1.....</b>       | <b>S1</b> |
| <b>Figures S1-S2 .....</b> | <b>S3</b> |
| <b>Figures S3-S4.....</b>  | <b>S4</b> |
| <b>Figures S5-S6.....</b>  | <b>S5</b> |
| <b>Figures S7-S8.....</b>  | <b>S6</b> |
| <b>Figures S9-S10.....</b> | <b>S7</b> |
| <b>Figure S11 .....</b>    | <b>S8</b> |

**Table S1.** Comparison of fluorescent probes for ClO<sup>-</sup>

| Probe                                                                               | Stokes shift | Test system                             | Detection limit | Response time | Application                                       | Literature                                                              |
|-------------------------------------------------------------------------------------|--------------|-----------------------------------------|-----------------|---------------|---------------------------------------------------|-------------------------------------------------------------------------|
| 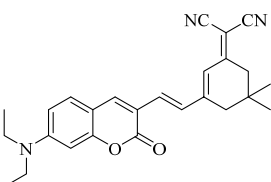   | 155 nm       | PBS buffer (pH7.4, containing 50% DMSO) | 0.17 $\mu$ M    | 100 s         | HepG2 cells<br>Mice                               | Sensors & Actuators: B. Chemical, 2019, 287, 453-458                    |
|    | 105 nm       | Bis-tris buffer (10 mM, pH = 7.4)       | 4.2 $\mu$ M     | --            | Zebrafish                                         | Spectrochim. Acta A Mol. Biomol. Spectrosc, 2021, 261, 120059           |
|   | 65 nm        | PBS buffer (pH 7.4, 10 mM, 20% DMSO)    | 58 nM           | 12 s          | HeLa cells                                        | Spectrochim. Acta A Mol. Biomol. Spectrosc, 2021, 246, 118953           |
|  | 106 nm       | PBS buffer (10 mM, pH 7.4, 10% DMF)     | 24.3 nM         | 25 s          | HeLa cells                                        | Anal. Chim. Acta, 2020, 1094, 122-129                                   |
|  | 55 nm        | PBS (pH = 7.4, containing 5 % MeOH)     | 0.355 $\mu$ M   | 30 s          | RAW 264.7 Cell,<br>Zebrafish<br>mouse liver slice | Journal of Photochemistry & Photobiology, A:Chemistry, 2023,434, 114204 |

|                                                                                     |        |                                                                   |              |             |                                                         |                                                                                       |
|-------------------------------------------------------------------------------------|--------|-------------------------------------------------------------------|--------------|-------------|---------------------------------------------------------|---------------------------------------------------------------------------------------|
| 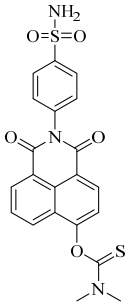   | 100 nm | PBS buffer<br>(10 mM, pH 7.4, 5% CH <sub>3</sub> CN)              | 57 nM        | 3 s         | HeLa cells                                              | Spectrochimica Acta Part A: Molecular and Biomolecular Spectroscopy 2023, 286, 121986 |
|    | 75 nm  | PBS<br>(10.0 mM, pH 7.4, containing 1% CTAB)                      | 0.58 μM      | 60 s        | RAW 264.7 cell<br>Zebrafish                             | Spectrochimica Acta Part A: Molecular and Biomolecular Spectroscopy 2021, 261, 120024 |
|   | 205 nm | PBS buffer<br>(10.0 mM, pH 7.4, containing 5% CH <sub>3</sub> CN) | 0.738 μM     | 3 s         | HeLa cells,                                             | Anal. Methods, 2021, 246, 118960                                                      |
|  | 84 nm  | PBS buffer<br>(20 mM, pH 7.4, containing 50% acetonitrile)        | 74 nM        | 100 s       | HeLa cells,<br>Zebrafish                                | Tetrahedron, 2022, 127, 133020                                                        |
|  | 125 nm | <b>PBS buffer<br/>(pH 7.4, 20 mM, containing 40% DMSO)</b>        | <b>72 nM</b> | <b>30 s</b> | <b>HeLa cells<br/>MCF-7 cells<br/>Mice liver tissue</b> | <b>This work</b>                                                                      |

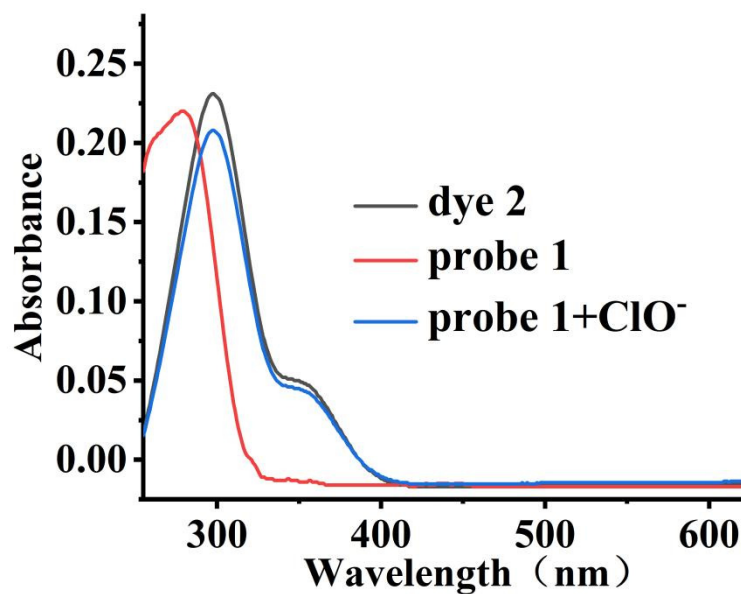

**Figure S1.** The absorption spectra of 10  $\mu\text{M}$  probe 1 (red), dye 2 (black) and probe 1 reacted with 100  $\mu\text{M}$   $\text{ClO}^-$  (blue).

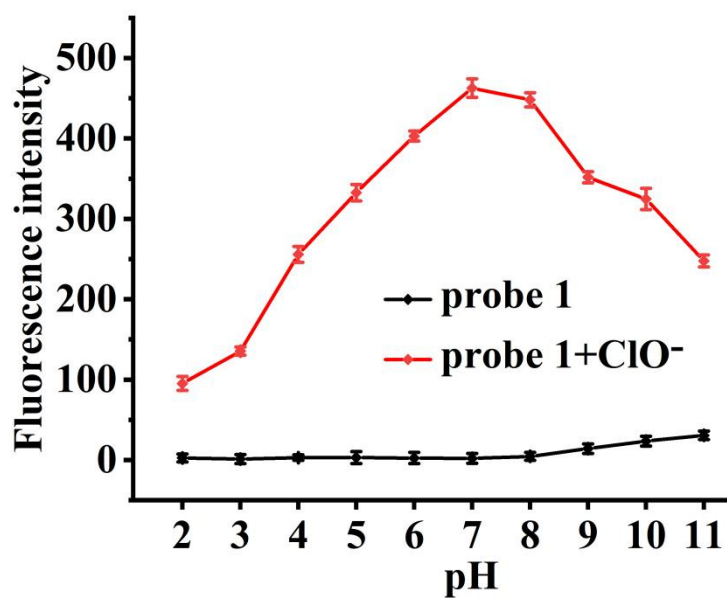

**Figure S2.** The fluorescence intensity of probe 1 (10.0  $\mu\text{M}$ ) before (■) and after (●) incubating with  $\text{ClO}^-$  (100.0  $\mu\text{M}$ ) at different pH value (2.0-11.0).

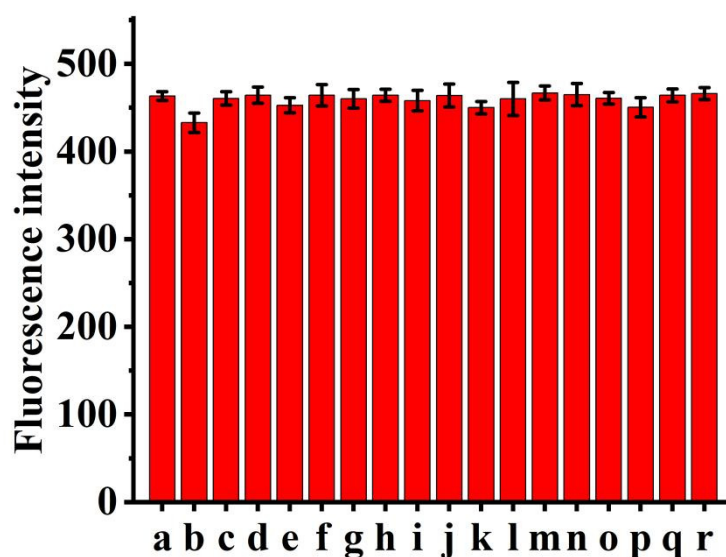

**Figure S3.** Fluorescence intensity (475 nm) of probe **1** (10.0  $\mu\text{M}$ ) after incubating with HClO (100.0  $\mu\text{M}$ ) in the presence of different competition species. (a)  $\text{ONOO}^-$ , (b)  $\text{H}_2\text{O}_2$ , (c)  $\cdot\text{O}^t\text{Bu}$ , (d) TBHP, (e) NO, (f)  $\text{O}_2^{\cdot-}$ , (g)  $\cdot\text{OH}$ , (h)  $\text{Cu}^{2+}$ , (i)  $\text{Na}^+$ , (j)  $\text{Mg}^{2+}$ , (k)  $\text{Ca}^{2+}$ , (l)  $\text{HS}^-$ , (m)  $\text{HCO}_3^-$ , (n)  $\text{SO}_4^{2-}$  (o)  $\text{NO}_2^-$ , (p) Hcy, (q) Cys (r) GSH.

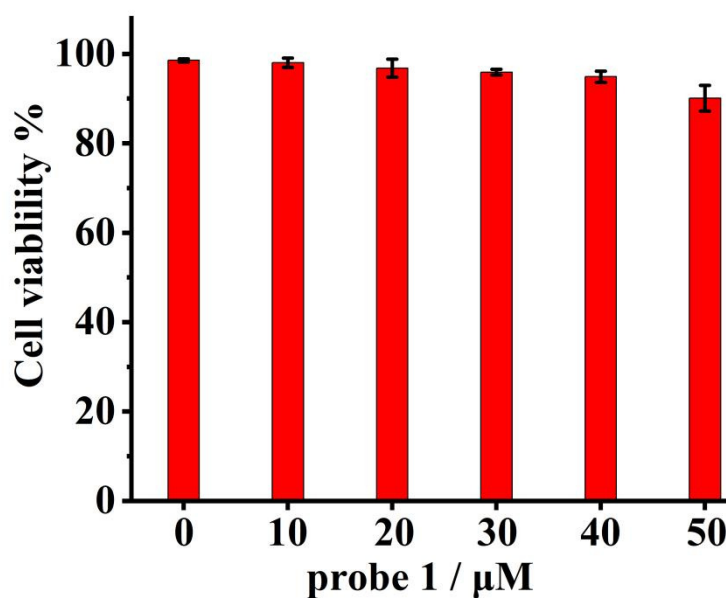

**Figure S4.** Cytotoxicity assays of probe **1** at different concentrations (0.0, 10.0, 20.0, 30.0, 40.0, 50.0  $\mu\text{M}$ ) for HeLa cells.

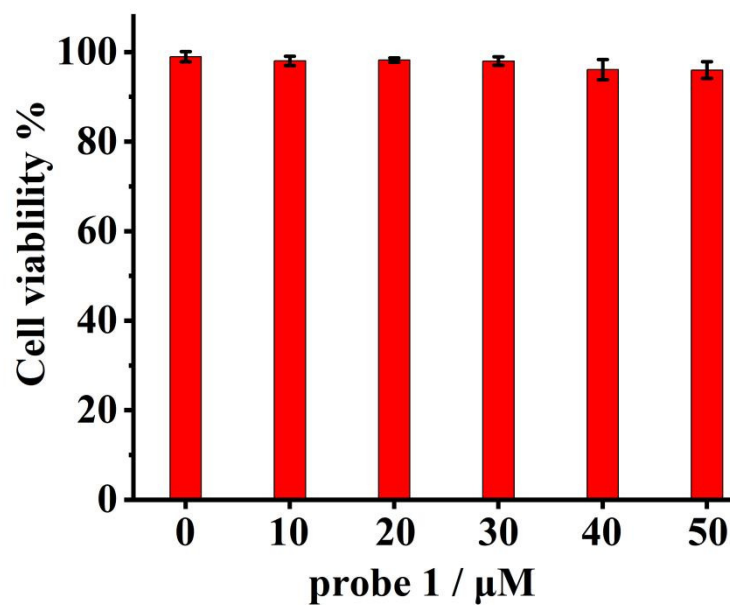

**Figure S5.** Cytotoxicity assays of probe **1** at different concentrations (0.0, 10.0, 20.0, 30.0, 40.0, 50.0  $\mu\text{M}$ ) for MCF-7 cells.

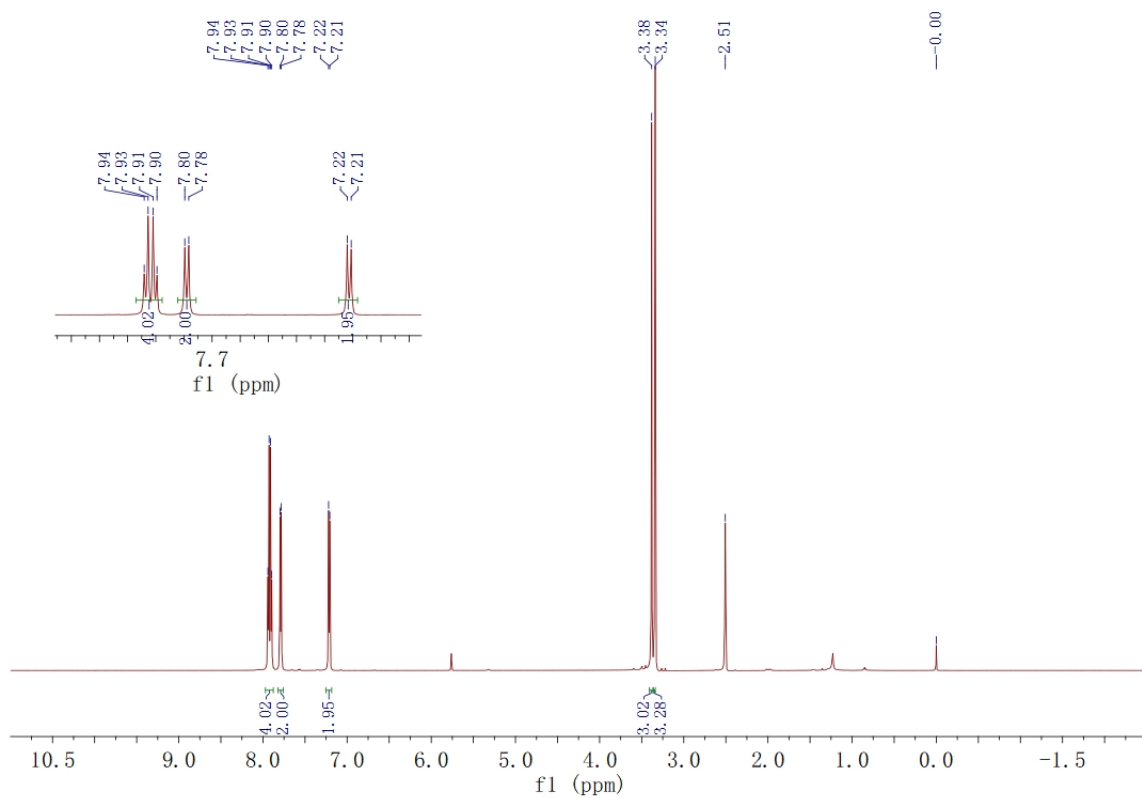

**Figure S6.**  $^1\text{H}$  NMR spectrum of probe **1** in  $\text{DMSO}-d_6$ .

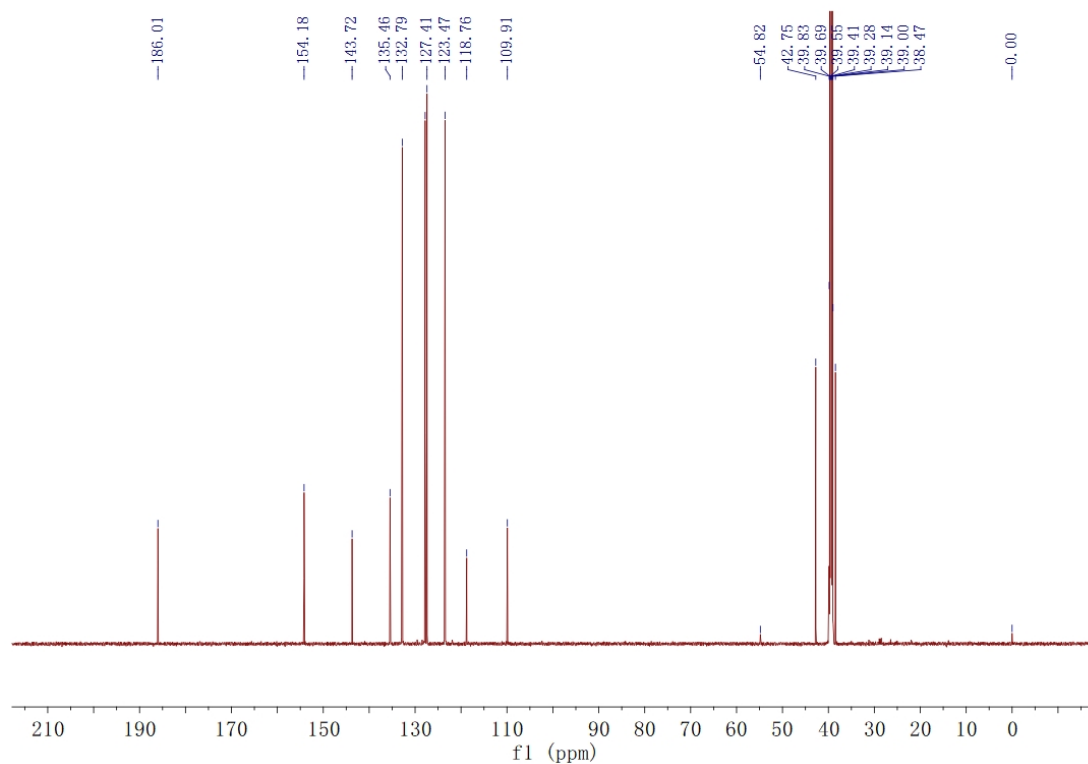

**Figure S7.**  $^{13}\text{C}$  NMR spectrum of probe 1 in  $\text{DMSO-}d_6$ .

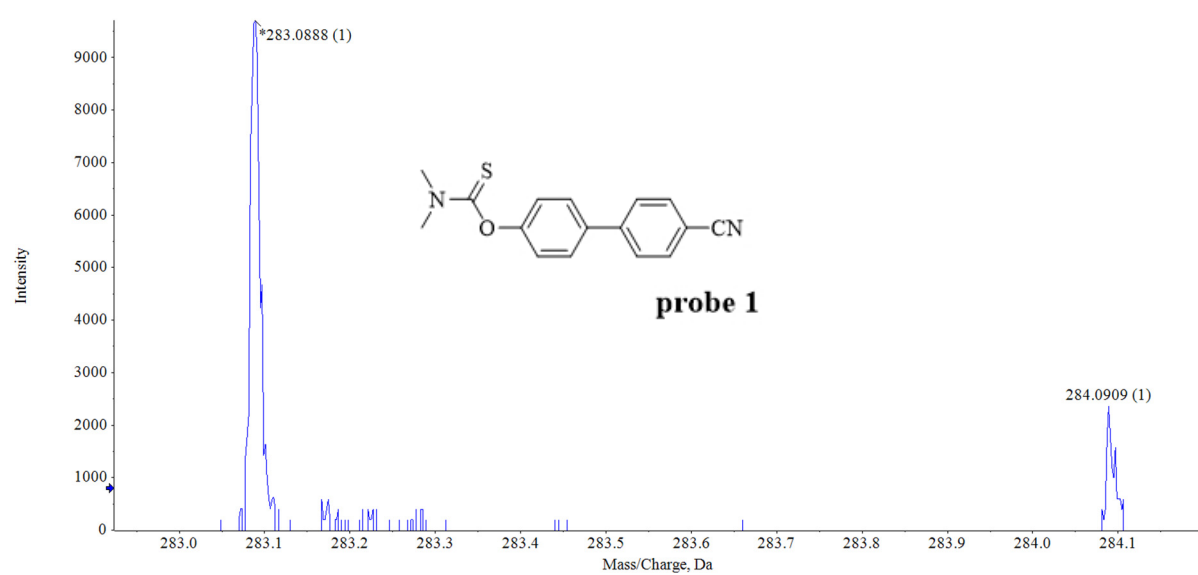

**Figure S8.** HRMS spectrum of probe 1.

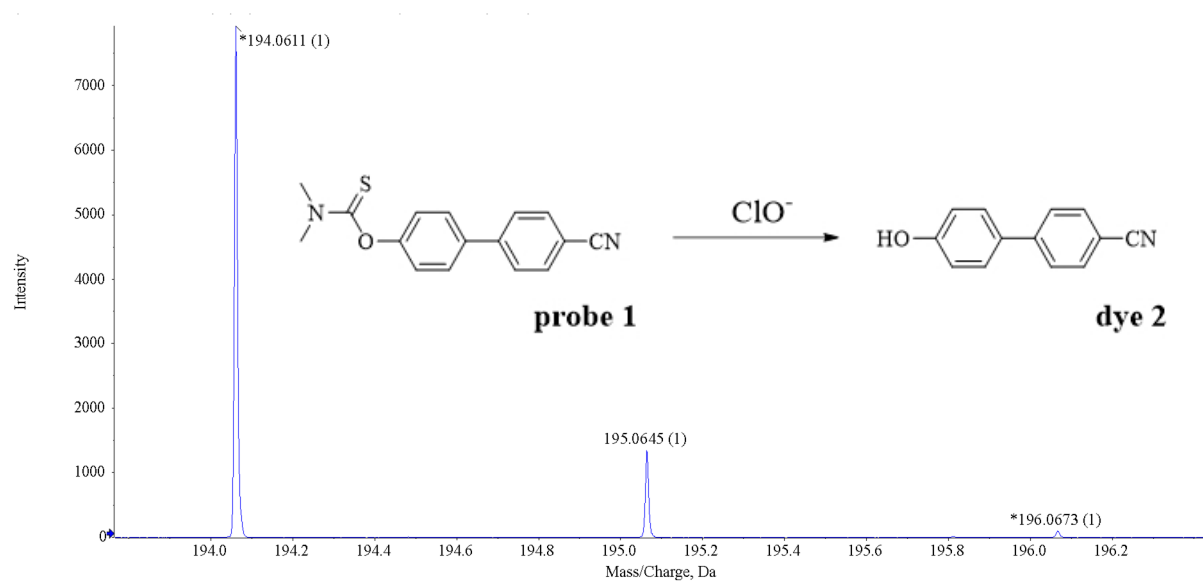

**Figure S9.** HRMS spectrum of probe **1** +  $\text{ClO}^-$ .

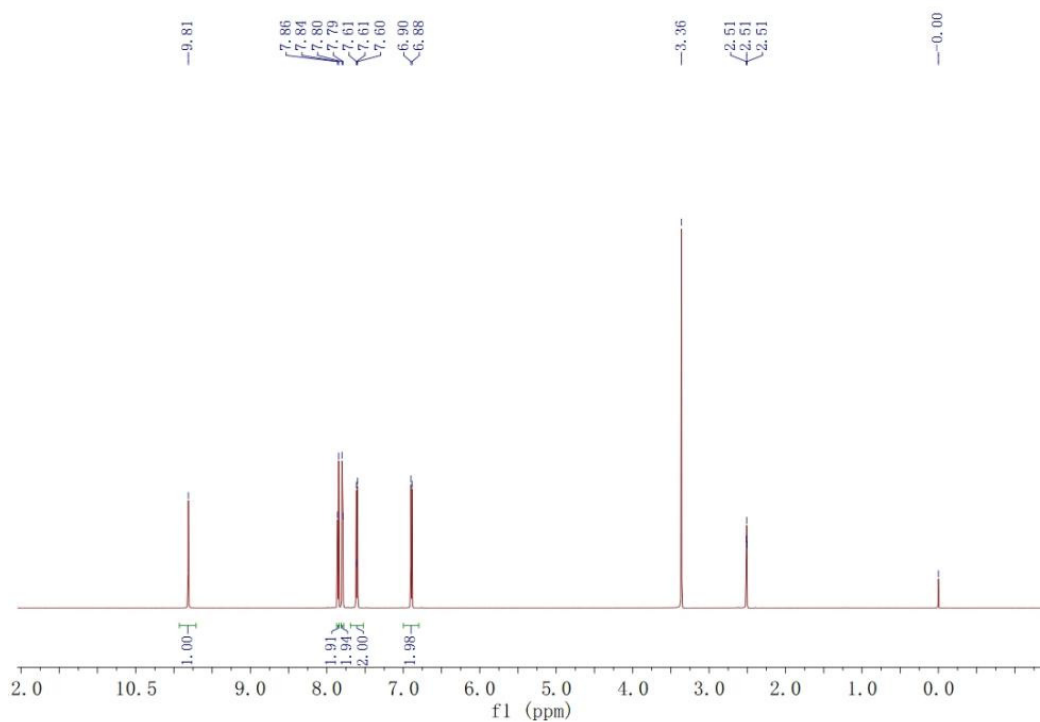

**Figure S10.**  $^1\text{H}$  NMR spectrum of the fluorescent product of probe **1** with  $\text{ClO}^-$  in  $\text{DMSO}-d_6$ .



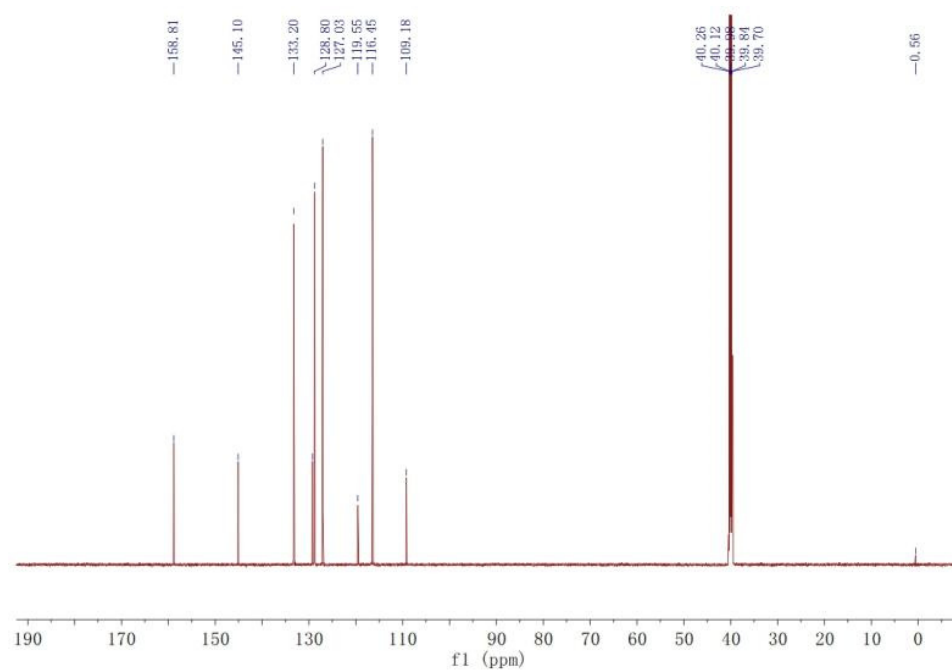

**Figure S11.**  $^{13}\text{C}$  NMR spectrum of the fluorescent product of probe 1 with  $\text{ClO}^-$  in  $\text{DMSO-}d_6$ .
